# Supplementary material for: Mechanistic analysis of rhizosphere promoting bacteria on tobacco growth, continuous cropping soil, and root microbiota
Source: Research Square preprint supplement (doi:10.21203/rs.3.rs-6220721/v1), 2025-04-14
Supplement: Supplementary file 1 [file ba3f959655363f40ded7b5f5.docx]

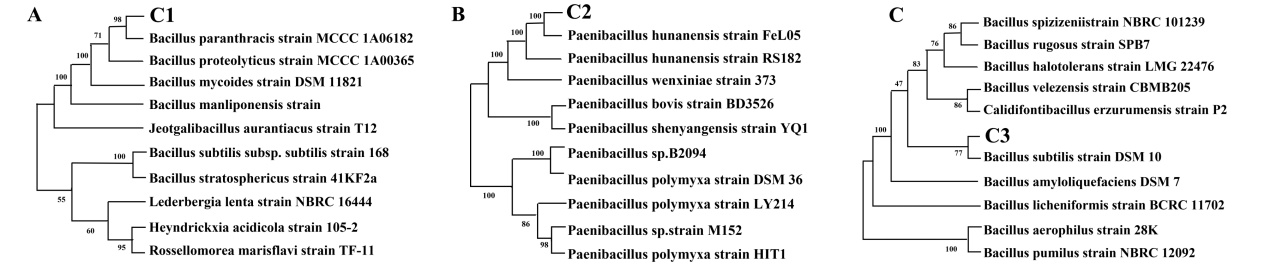


Figure S1 Phylogenetic tree based on 16S rDNA sequences. (A) C1, (B) C2, (C) C2.


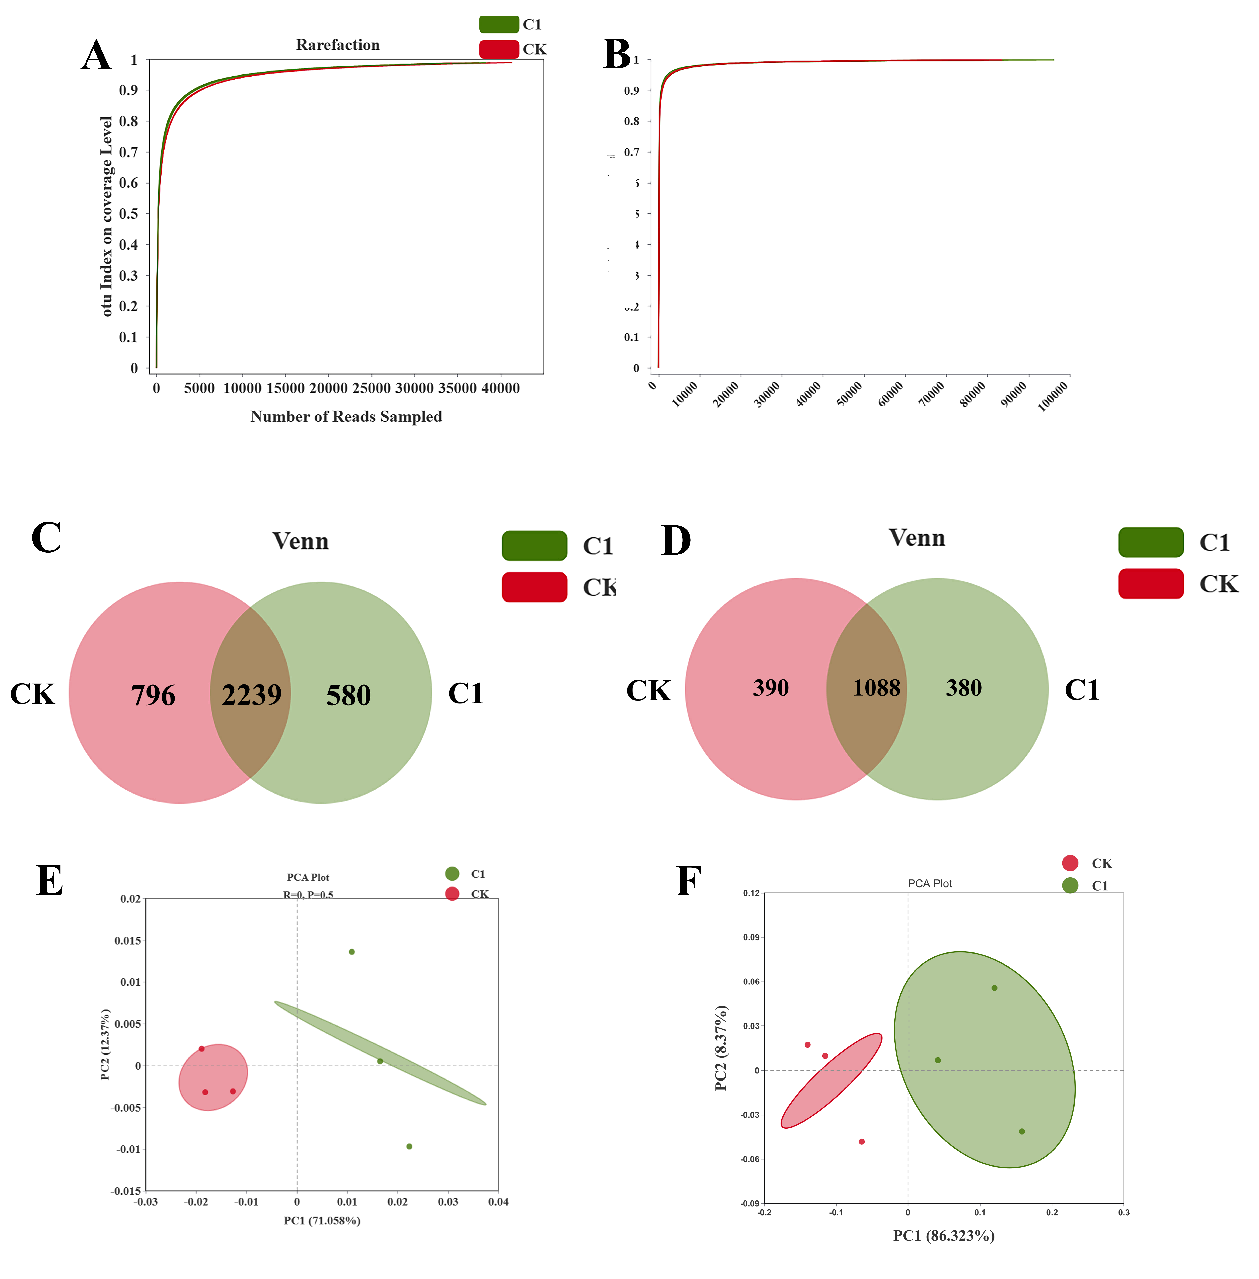


Figure S2 Dilution curves of different treatments based on OTU level coverage index (a) bacterial , (b)fungal. Venn diagrams of rhizosphere (c) bacteria, (d) fungi. PCA analysis of (e) bacterial, (f) fungal
